# Supplementary material for: Polyethylenimine-alginate nanocomposites based bone morphogenetic protein 2 gene-activated matrix for alveolar bone regeneration
Source: PubMed Central journal article supplement — RSC Adv. 2019 Aug 28;9(46):26598–608. doi: 10.1039/c9ra05164c (PMC9070436; doi:10.1039/c9ra05164c), 2019-08-28
Supplement: RA-009-C9RA05164C-s001.pdf [file RA-009-C9RA05164C-s001.pdf]

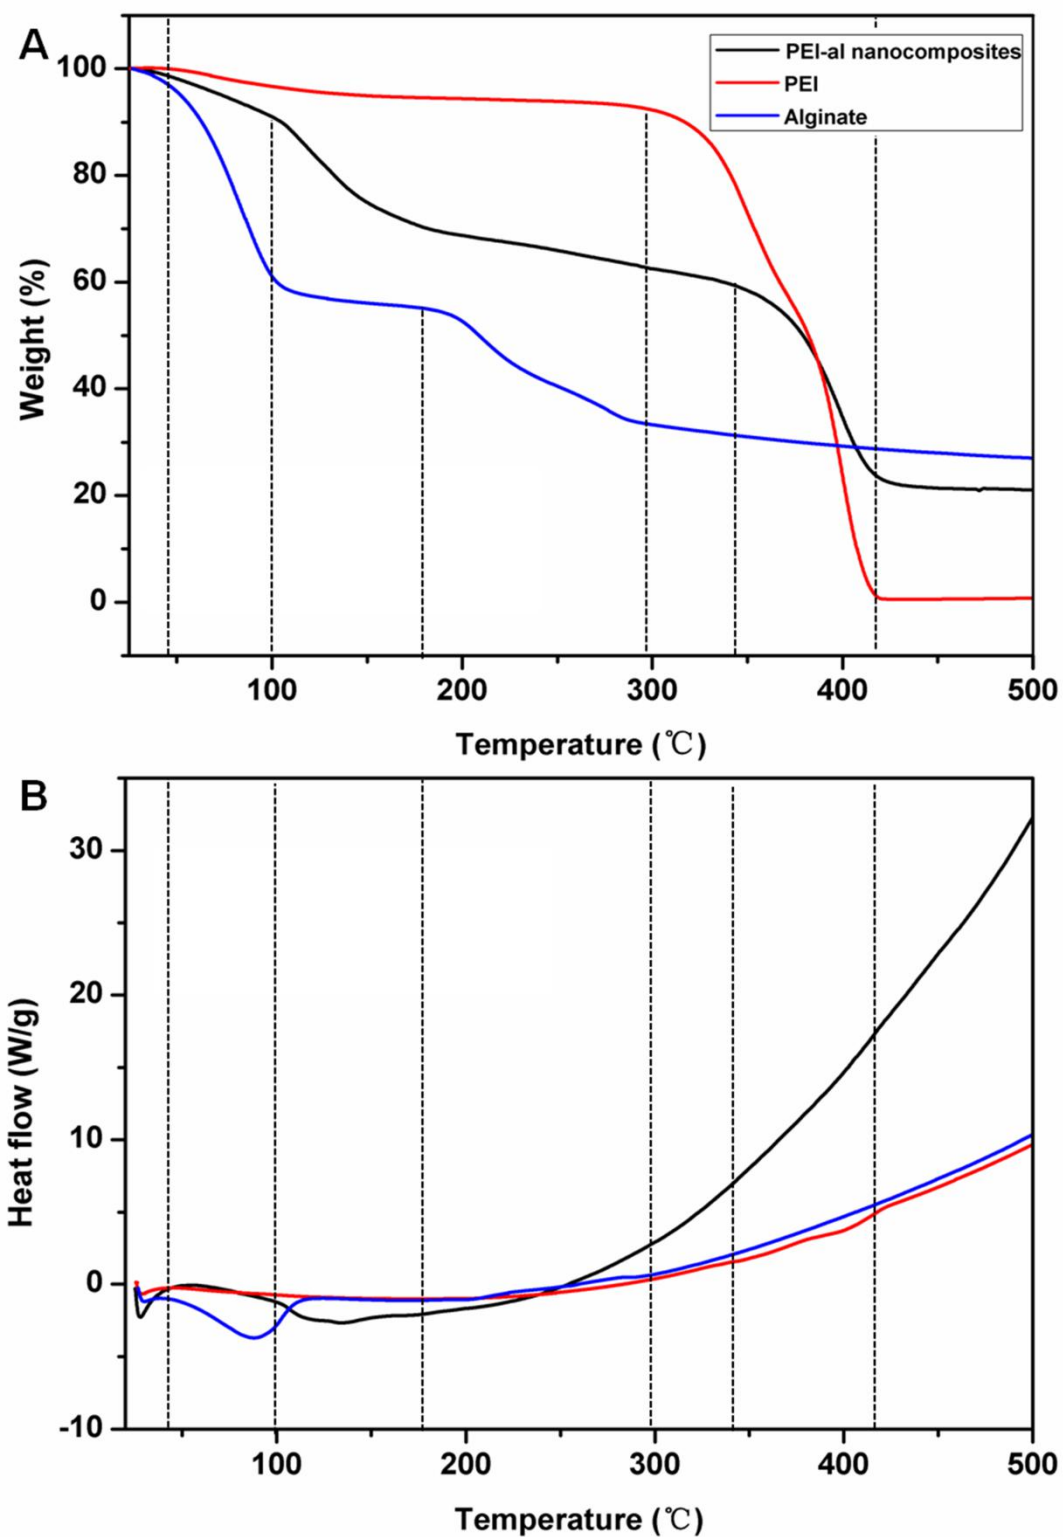

**Figure S1:** Thermal properties of PEI-al nanocomposites, PEI and alginate. (A) TGA curves. (B) DSC curves.

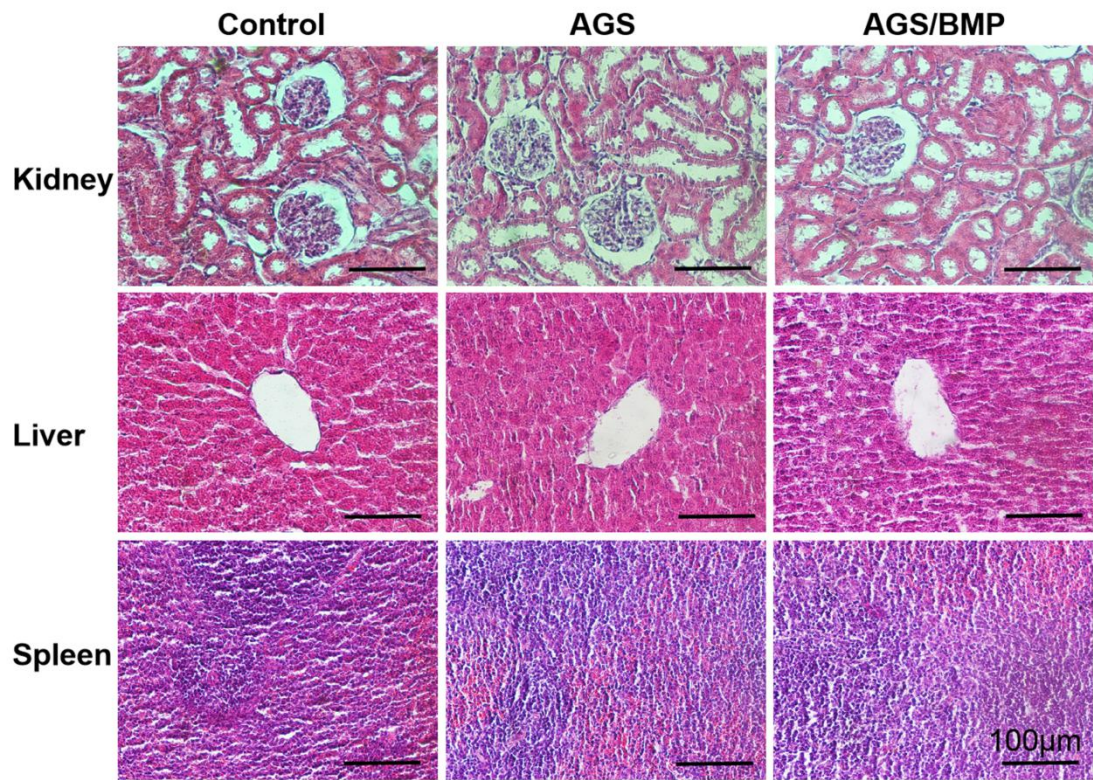

**Figure S2:** Hematoxylin and eosin staining of kidney, liver and spleen from rats ( $\times 200$ ).
